# Supplementary material
Source: PubMed Central journal article supplement (PMC3286815)
Supplement: Supp_Data.pdf [file Supp_Data.pdf]

## Supplementary Data

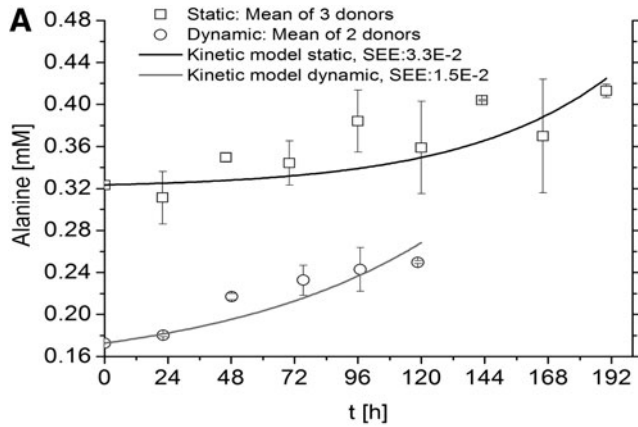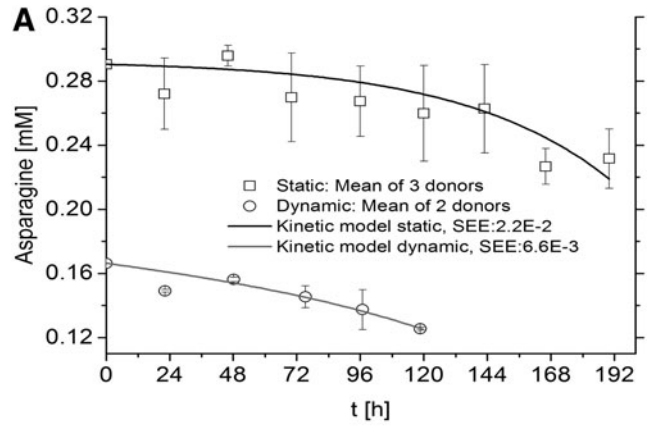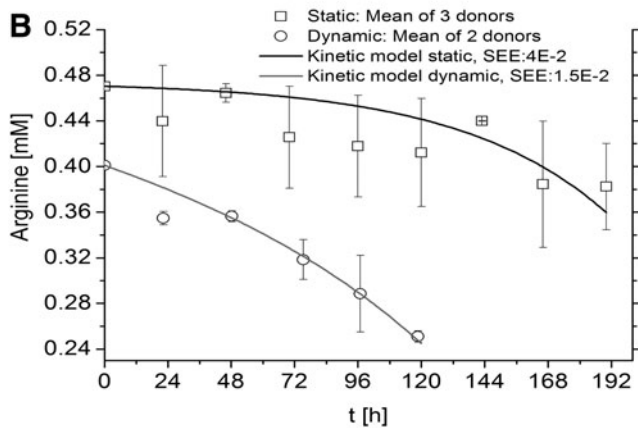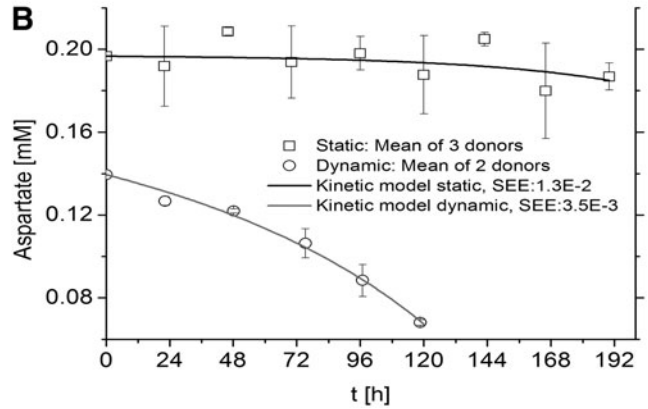

**SUPPLEMENTARY FIG. S1.** Nonessential amino acids have a distinct metabolism in hMSCs culture. **(A)** Alanine is secreted. **(B)** Arginine is consumed. Experimental concentrations, kinetics model, and standard error of estimates (SEE) are shown. hMSCs, human mesenchymal stem cells.

**SUPPLEMENTARY FIG. S2.** Nonessential amino acids have a distinct metabolism in hMSCs culture. **(A)** Both asparagine and **(B)** aspartate are consumed. Experimental concentrations, kinetics model, and SEE are shown.

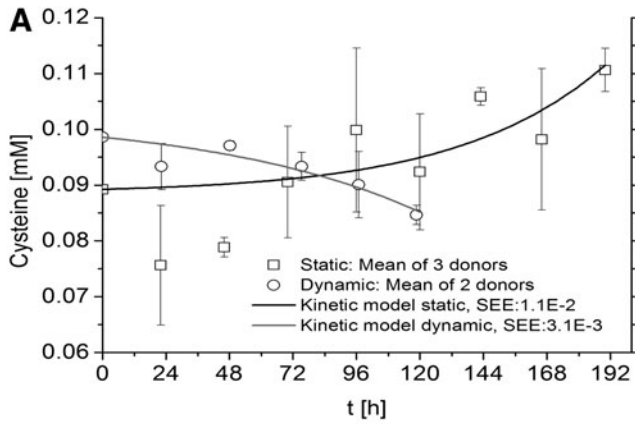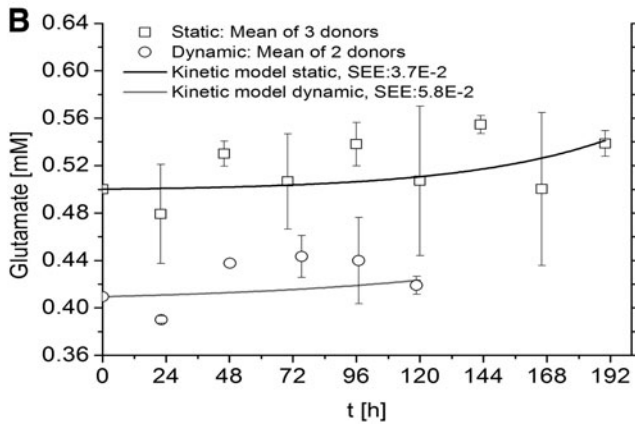

**SUPPLEMENTARY FIG. S3.** Nonessential amino acids have a distinct metabolism in hMSCs culture. **(A)** Cysteine is secreted in static cultures and consumed in dynamic cultures. **(B)** Glutamate is secreted. Experimental concentrations, kinetics model, and SEE are shown.

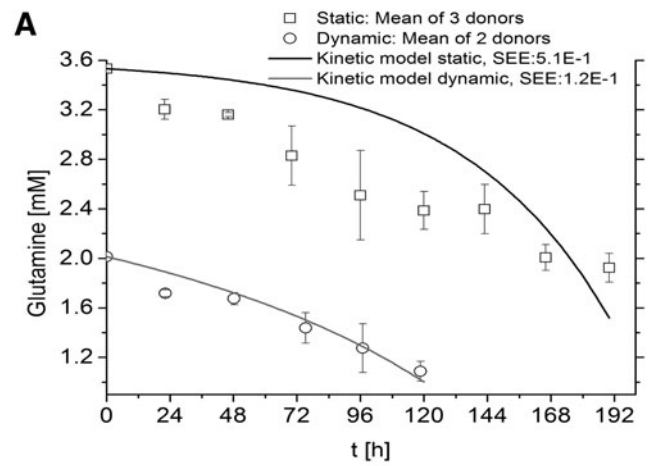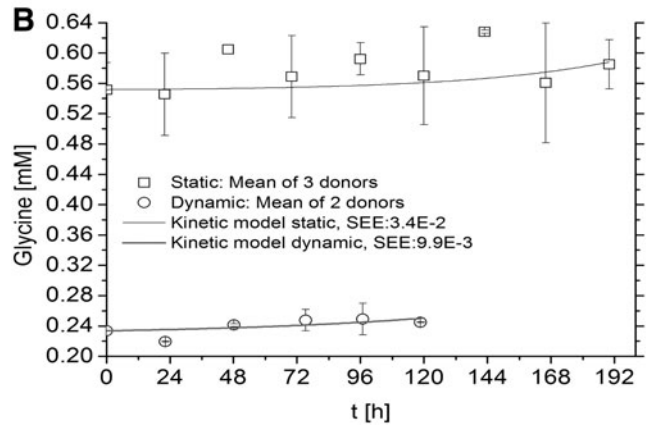

**SUPPLEMENTARY FIG. S4.** Nonessential amino acids have a distinct metabolism in hMSCs culture. **(A)** Glutamine is consumed. **(B)** Glycine is secreted. Experimental concentrations, kinetics model, and SEE are shown.

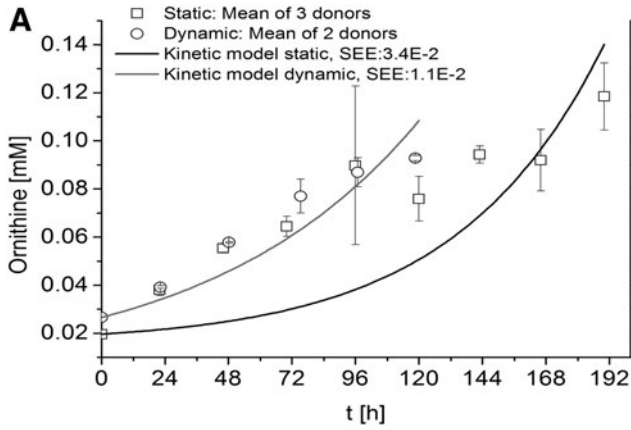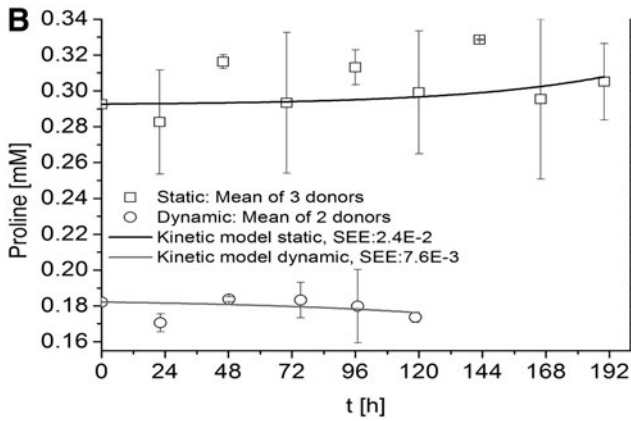

**SUPPLEMENTARY FIG. S5.** Nonessential amino acids have a distinct metabolism in hMSCs culture. **(A)** Ornithine is secreted. **(B)** Proline is secreted in static culture and consumed in dynamic cultures. Experimental concentrations, kinetics model, and SEE are shown.

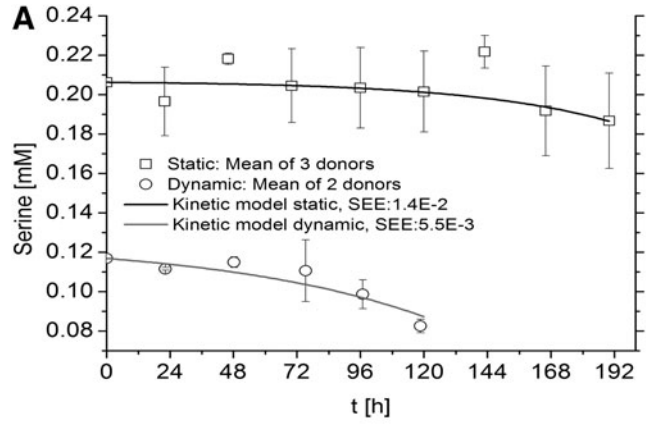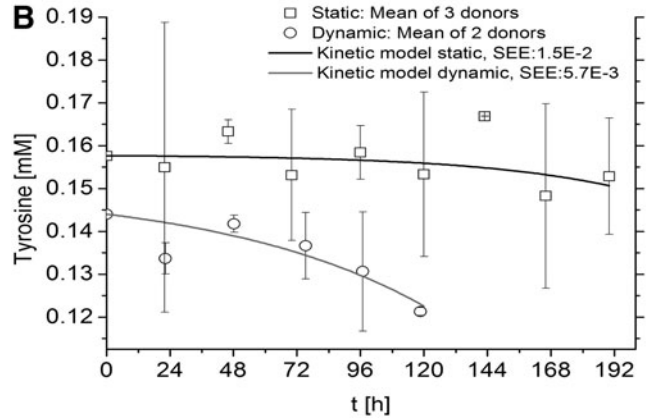

**SUPPLEMENTARY FIG. S6.** Nonessential amino acids have a distinct metabolism in hMSCs culture. **(A)** Serine and **(B)** tyrosine are both consumed. Experimental concentrations, kinetics model, and SEE are shown.

**SUPPLEMENTARY TABLE S1.** SPECIFIC GROWTH RATES ( $\mu$ ), GLUCOSE ( $Q_{GLUC}$ ), LACTATE ( $Q_{LAC}$ ), AND  $Y_{LAC/GLUC}$  WITH STANDARD DEVIATIONS

| Donor          |                                     | Static |     |      |     | Dynamic |      |      |      |       |      |
|----------------|-------------------------------------|--------|-----|------|-----|---------|------|------|------|-------|------|
|                |                                     | 1      | SD  | 2    | SD  | 3       | SD   | 1    | SD   | 2     | SD   |
| Viable Cells   | $\mu$ [ $h^{-1}$ ] $\times 10^{-2}$ | 1.86   | 0.1 | 1.85 | 0.1 | 1.87    | 0.06 | 1.21 | 0.2  | 1.29  | 0.1  |
| Glucose        | $q_{gluc}$ [picomoles/cell/h]       | -0.4   | 0.2 | -0.9 | 0.7 | -0.9    | 0.7  | -0.6 | 0.02 | -0.62 | 0.03 |
| Lactate        | $q_{lac}$ [picomoles/cell/h]        | 1.2    | 0.4 | 1.1  | 0.8 | 2.3     | 0.7  | 1.3  | 0.03 | 1.2   | 0.04 |
| $Y_{lac/gluc}$ | $q_{lac}/q_{gluc}$ [-]              | 3.08   |     | 1.2  |     | 2.6     |      | 2.2  |      | 1.9   |      |

Static cultures (three donors) and dynamic cultures (two donors).

**SUPPLEMENTARY TABLE S2.** AMINO ACIDS WITH SIGNIFICANT DEGRADATION RATES IN STATIC AND DYNAMIC CULTURES

|            | $[h^{-1}]$ | Static                  |                     |       | Dynamic                |                     |       |
|------------|------------|-------------------------|---------------------|-------|------------------------|---------------------|-------|
|            |            | $\times 10^{-3}$ (n=10) | $SD \times 10^{-3}$ | $R^2$ | $\times 10^{-3}$ (n=7) | $SD \times 10^{-3}$ | $R^2$ |
| Arginine   | $k_r$      | 1.2                     | 0.7                 | 0.80  | 2.6                    | 1.3                 | 0.83  |
| Aspartate  | $k_d$      | 1.1                     | 0.7                 | 0.74  | 2.1                    | 1.0                 | 0.83  |
| Asparagine | $k_n$      | 1.3                     | 0.6                 | 0.86  | 1.8                    | 1.3                 | 0.71  |
| Glutamine  | $k_q$      | 3.3                     | 0.7                 | 0.96  | 3.0                    | 1.2                 | 0.86  |
| Ornithine  | $k_o$      | 5.7                     | 1.8                 | 0.89  | 7.3                    | 3.6                 | 0.79  |
